# Supplementary material
Source: ML conference proceedings conference paper supplement (https://openreview.net/forum?id=eOOiCyZ_h9f)
Supplement: supplementary_material [file attachment]

## A Appendix

### A.1 StudentSADD data description

The Student Suicidal Ideation and Depression Detection (StudentSADD) dataset includes 345 sessions of data from 302 unique student participants with modalities including participant demographics, PHQ-9 scores, responses to a text prompt, unscripted audio recordings, scripted audio recordings, Twitter data (whether or not the participant has Twitter and their Twitter username), and retrospective phone data (calendar, call logs, text logs, contacts and GPS). Participants were given access to an Android app and Website Survey. They could choose which version of the survey took. All questions were the same, however, phone data was only collected from students who used the Android app. All publicly available data is stored in CSV files.

Responses to the text prompt, demographic questions, phq-9 questions, willingness to share, and timestamps of submission by participants, can be found in `summaryDataStudentSADD.csv`. Participants were asked to share their favorite place (text prompt); demographic info, specifically, age, gender, student status, race/ethnicity, whether or not they have had prior depression treatment, whether they were remote, and whether or not they had covid; responses to 9 depression screening questions with four point Likert scales; GPS data (if shared); and Twitter information, such as whether or not they have Twitter and their username. Participant willingness to share audio and phone data was also included in this file. The sessions from the same student are also marked as copies in this CSV file.

The file `phoneDataStudentSADD.csv` includes data collected from those participants who used the Android app and elected to share phone data. Each phone modality could be shared or denied. Phone data modalities that could be elected to be shared were calendar entries, call logs, text logs, and contact entries. All names and phone numbers in these data modalities were one-way hashed. The file includes calendar and contacts entries, for which the count can be extracted. The call and text logs include a one-way hashed address (phone number) of the sender/receiver, as well as the timestamp and size/length of each correspondence.

The file `scriptedTranscript.csv` contains scripted audio transcripts and the file `unscriptedTranscript.csv` contains unscripted audio transcripts. These CSV files also have the PHQ-9 and item-9 scores of the corresponding participants. Feature and embedding representations of the audio data will be released instead of the raw audio data to protect student privacy. The files `scriptedSMILE.csv` and `unscriptedSMILE.csv` contain examples of extracted audio features.

Further, detailed results for machine learning models that use the StudentSADD data will be released. The files `baselineScriptedML.csv`, `baselineUnscriptedML.csv`, `baselineTranscriptML.csv`, and `baselineTextML.csv` contain examples of detailed machine learning model results.

84 IDs were designated as a test set to evaluate the machine learning models trained on this data. The Test and Train IDs can be found below. In addition to the training IDs from unique students, we have also included the IDs from duplicated entries. Note, not all IDs shared every modality.

Test IDs: [1607712777, 292, 2613, 1610640355, 1607494599, 1607040811, 1608492986, 6390, 396, 1607734901, 1607350992, 1608992344, 1609903202, 74, 7159, 4698, 7547, 4441, 1607097951, 8479, 8170, 4707, 7516, 1609174124, 1608853150, 8516, 1611424664, 2843, 1607040596, 1953, 1607772081, 1608564004, 2627, 1607217921, 1607118643, 1607314413, 1609887404, 1608335387, 4098, 1607046006, 1608242917, 8918, 1607131299, 9754, 1607262842, 1607273026, 2478, 1607536408, 1607291545, 1608707232, 1609941585, 1608200497, 1610630377, 7711, 1607810287, 9934, 1608850448, 4041, 1609166629, 1608168856, 1607572897, 6831, 1608586814, 1608588581, 2837, 8180, 1608631410, 1607051003, 3830, 4879, 1608920128, 1607019351, 8181, 3473, 1608335906, 1607738757, 1608770486, 7564, 1607495239, 1609983150, 1607397061, 1607696074, 103, 2222]

Unique Train IDs: [4769, 1607928177, 1607269923, 7755, 4598, 1607807806, 1608741452, 3323, 1610110670, 1607133044, 9745, 1607291670, 5245, 4442, 319, 1607133218, 1607010270, 1608587203, 1609256130, 1608582258, 5028, 1609771771, 5229, 3517, 1608595561, 1608048050, 1607410780, 528, 1607134906, 3102, 1607555727, 1609887167, 3985, 7256, 3523, 1607289708, 1609890222, 850, 1608917024, 5047, 1608061691, 4782, 1608062276, 1056, 1611517276, 1607636681, 1607891972, 5571, 1609052616, 1607927243, 2525, 4353, 1610818662, 8640, 1607559849, 6706, 1608624428, 1607968838, 1608672132, 552, 1608537399, 1610381937, 1608607986, 381, 1608589576, 3920, 1608059746, 1609027319, 1607357022, 1607691623,

578 1609899907, 1608470962, 8791, 1610380419, 3064, 1609473849, 1607712704, 1609887249,  
579 1609888813, 1608588103, 1244, 7279, 1607339125, 1607712682, 8472, 1269, 1607045076,  
580 1607365865, 1846, 191, 1811, 1608702785, 1609049435, 5330, 1607257348, 1609890530,  
581 3278, 1608586899, 1607939718, 2430, 1609893292, 60, 1607270186, 6336, 8650, 1608495626,  
582 1608586953, 2121, 1607295286, 896, 1609889389, 1607560754, 6548, 6580, 1607440988,  
583 1609111416, 1607807159, 8663, 1607129044, 6658, 1607799213, 3933, 1608596696, 1608663032,  
584 1610791060, 1607135820, 1607413039, 1607659758, 1608487726, 4859, 1609142183, 1607276888,  
585 7452, 1607368510, 1607266081, 2623, 1608416516, 2128, 3227, 5881, 6510, 1609166843,  
586 7569, 1607712793, 1608850996, 3273, 1607939838, 9986, 3302, 1607206195, 1609082904,  
587 1607510222, 7612, 1607022963, 1607051040, 1607719324, 1608849324, 1607642639, 1607104225,  
588 705, 1608506424, 1608188073, 8018, 8085, 4755, 1611704179, 1607193886, 7007, 3041, 4001,  
589 1552, 1716, 1608053349, 1608572299, 1608051417, 1607712784, 836, 1607929944, 1607795480,  
590 1608200317, 415, 3662, 1610109929, 2496, 8550, 6868, 1608587385, 1608591490, 7370, 4549,  
591 7505, 1879, 1876, 1608003341]

592 Duplicated Train IDs: [1607315588, 1607087749, 518, 6280, 1607315467, 1607497867,  
593 1608359052, 8468, 1607124379, 6941, 1607510942, 1607921053, 1611575587, 1608201126,  
594 1607639591, 4521, 1607315498, 1607639340, 1607785646, 1609353141, 1607453496, 1607293881,  
595 1607674683, 5948, 1608683584, 1608087234, 3267, 1607802179, 7109, 838, 9034, 1868,  
596 1608683738, 8284, 95, 1609154655, 1607159523, 1607124838, 1607088999, 7912, 1607802347,  
597 1607764720, 1607785968]

## 598 **A.2 Data and code access for reviewers**

599 To access the StudentSADD data, reviewers can use the login information (provided in the submission  
600 system) at our project website: <https://emutivo.wpi.edu/data/>

601 Upon publication, we will grant similar access to other researchers who request our data and agree to  
602 the terms of the data licence in Section A.3. This approach is standard for datasets in this domain  
603 [32; 34]. This is not a static dataset, as we will continue to add more data features and embedding  
604 representations. We have inquired about obtaining a DOI for StudentSADD through our institutional  
605 library.

606 To access the code used to generate the results in this paper, reviewers can navigate to our public  
607 github repository: <https://github.com/mltlachac/StudentSADD>

## 608 **A.3 StudentSADD Dataset - End User License Agreement**

609 (<https://emutivo.wpi.edu>)

610 The person in request may download and use this database only after signing and returning this  
611 agreement form. By signing this document, the user agrees to the following terms:

### 612 **Commercial and academic use**

613 The database is made available for research purposes only. Any commercial use of this data is  
614 forbidden.

### 615 **Redistribution**

616 The user may not distribute the database or parts of it to any third party.

### 617 **Publications**

618 The use of data for illustrative purposes in publications is allowed. Publications include both scientific  
619 papers and presentations for scientific/educational purposes. In this case, the identity of the subjects  
620 should be protected (no release of identifiable information for subjects).

### 621 **Citation**

622 All publications reporting on research using this database have to acknowledge this by citing the  
623 following article:

624 *ML Tlachac, Ricardo Flores, Miranda Reisch, Rimsha Kayastha, Nina Taurich, Veronica Melican,*  
625 *Connor Bruneau, Hunter Caouette, Eraldo Toto, Elke Rundensteiner, "StudentSADD: Mobile De-*

626 *pression and Suicidal Ideation Screening of College Students during the Coronavirus Pandemic”,*  
627 *in Submission at Neural Information Processing System (NeurIPS) 2021 Datasets and Benchmarks*  
628 *Track*

629 For specific software output that is shared as part of this data, the user agrees to respect the individual  
630 software licenses and use the appropriate citations as mentioned in the documentation of the data.

#### 631 **EULA changes**

632 Worcester Polytechnic Institute is allowed to change these terms of use at any time. In this case,  
633 users will be informed of the changes and will have to sign a new agreement form to keep using the  
634 database.

#### 635 **Warranty**

636 The database comes without any warranty. In no event shall the provider be held responsible for any  
637 loss or damage caused by the use of this data.

639 \_\_\_\_\_

|                  |          |               |
|------------------|----------|---------------|
| 640 Name         | 640 Date | 640 Signature |
| 641              |          |               |
| 642              |          |               |
| 643 Organization |          | 643 Address   |

### 644 **A.4 Data management plan**

#### 645 **Data description and formats**

646 The Student Suicidal Ideation and Depression Detection (StudentSADD) dataset contains 245 sessions  
647 submitted through a mobile app by 302 students over between August 2020 and January 2021. The  
648 data includes PHQ-9, demographics, retrospective phone data, text prompt, audio recordings, location  
649 history, and tweets. The audio is stored as WAV files. The remaining data is stored as text in CSV  
650 files.

#### 651 **Data archiving, access and sharing, and data preservation**

652 Data will be stored in the file systems of Worcester Polytechnic Institute (WPI). The stored data will  
653 be protected with disk mirroring, daily backups and other means. Full-time system administrators will  
654 monitor the security and availability of these systems. Appropriate access control and other security  
655 policies and mechanisms will be put in place to protect the integrity, security, privacy, confidentiality  
656 and other rights or requirements. For access by and sharing with the greater research community  
657 and general public, research group websites will be used, and personally identifiable information  
658 (PII) will be appropriately removed or anonymized from the essential data used for our research. To  
659 protect privacy, confidentiality or other rights/requirements, while at the same time ensuring scientific  
660 reproducibility and verifiability, the data will be summarized in the forms of intermediate statistics,  
661 and made publicly available, or when requested from other researchers.

#### 662 **Data privacy**

663 Data will be shared only under rules specified by our IRBs, and only when properly anonymized.  
664 The systems on which the data will be stored will have access restricted to the project members via  
665 standard filesystem permissions management. The server on which the data is stored is within the  
666 University’s restricted access datacenter. Files that will be made publicly available will not contain  
667 any identifiable location information.

#### 668 **Policies and provisions for re-use, re-distribution**

669 Any data collected will be in compliance with the IRB protocols of Worcester Polytechnic Institute.  
670 Data gathered for this project may be reused in other, related, research projects conducted by the PIs  
671 or graduate students. It is expected that other researchers in machine learning in mental health would  
672 be interested in our dataset. Requests for the data would be handled as per Section III. These datasets  
673 cannot be used for commercial applications or purposes, or changed and resubmitted without the PIs’  
674 permission and are subject to the intellectual property policies of WPI.

675 **Rights and Obligations**

676 The Principal Investigators (PIs) will be responsible for the implementation of the Data Manage-  
677 ment Plan. WPI owns the technology developed at each individual university by each university's  
678 employees.
